# Supplementary material for: Network Toxicology and Molecular Docking to Investigate the Non-AChE Mechanisms of Organophosphate-Induced Neurodevelopmental Toxicity
Source: MDPI journal article supplement (doi:10.3390/toxics11080710), 2023-08-17
Supplement: s1 [file s1]

**Table S1.** - Topological measurements of nodes in the PPI network of diazinon oxon-induced developmental neurotoxicity.

| Protein                                                       | Node     | k  | Clustering coefficient | BC     | ASPL   | CC     |
|---------------------------------------------------------------|----------|----|------------------------|--------|--------|--------|
| Epidermal growth factor receptor                              | EGFR     | 14 | 0.1648                 | 0.2748 | 2.1429 | 0.4667 |
| Proto-oncogene tyrosine kinase SRC                            | SRC      | 13 | 0.2179                 | 0.1544 | 2.2857 | 0.4375 |
| Heat shock protein HSP 90-alpha                               | HSP90AA1 | 11 | 0.1091                 | 0.1543 | 2.4286 | 0.4118 |
| Histone acetyltransferase p300                                | EP300    | 9  | 0.0278                 | 0.3026 | 2.4898 | 0.4016 |
| Phosphatidylinositol 3-kinase regulatory subunit alpha        | PIK3R1   | 9  | 0.2500                 | 0.2378 | 2.4082 | 0.4153 |
| <b>Signal transducer and activator of transcription 3</b>     | STAT3    | 8  | 0.1786                 | 0.1418 | 2.3265 | 0.4298 |
| Estrogen receptor                                             | ESR1     | 7  | 0.1905                 | 0.2018 | 2.2449 | 0.4455 |
| Calmodulin-1                                                  | CALM1    | 7  | 0.0000                 | 0.1683 | 2.6531 | 0.3769 |
| Tyrosine-protein phosphatase non-receptor type 11             | PTPN11   | 7  | 0.4286                 | 0.0164 | 2.7143 | 0.3684 |
| Insulin-like growth factor 1 receptor                         | IGF1R    | 6  | 0.1333                 | 0.0556 | 2.5918 | 0.3858 |
| Mitogen-activated protein kinase1                             | MAPK1    | 6  | 0.2000                 | 0.0520 | 3.0612 | 0.3267 |
| Signal transducer and activator of transcription 1-alpha/beta | STAT1    | 5  | 0.5000                 | 0.0375 | 2.4694 | 0.4050 |
| Presenilin                                                    | PSEN1    | 4  | 0.5000                 | 0.5333 | 1.3333 | 0.7500 |
| Nicastrin                                                     | NCSTN    | 4  | 0.8333                 | 0.0667 | 1.5000 | 0.6667 |
| Gamma-secretase subunit APH-1A                                | APH1A    | 4  | 0.8333                 | 0.0667 | 1.5000 | 0.6667 |
| Gamma-secretase subunit PEN-2                                 | PSENEN   | 4  | 0.8333                 | 0.0667 | 1.5000 | 0.6667 |
| Tyrosine-protein phosphatase non-receptor type 1              | PTPN1    | 4  | 0.5000                 | 0.0036 | 2.8980 | 0.3451 |
| Platelet-derived growth factor receptor beta                  | PDGFRB   | 4  | 0.6667                 | 0.0030 | 2.8163 | 0.3551 |
| Hepatocyte growth factor receptor                             | MET      | 4  | 0.8333                 | 0.0002 | 2.9184 | 0.3427 |
| Cell division control protein 42 homolog                      | CDC42    | 3  | 0.0000                 | 0.1556 | 3.2245 | 0.3101 |
| <b>Poly [ADP-ribose] polymerase 1</b>                         | PARP1    | 3  | 0.0000                 | 0.1178 | 3.3469 | 0.2988 |
| Mitogen-activated protein kinase14                            | MAPK14   | 3  | 0.3333                 | 0.0312 | 2.9592 | 0.3379 |
| Androgen receptor                                             | AR       | 3  | 0.3333                 | 0.0230 | 2.6939 | 0.3712 |
| Serine/threonine-protein kinase B-raf                         | BRAF     | 3  | 0.3333                 | 0.0185 | 3.2449 | 0.3082 |
| Tyrosine-protein kinase ABL1                                  | ABL1     | 3  | 0.6667                 | 0.0079 | 2.7347 | 0.3657 |
| Tyrosine-protein kinase Lck                                   | LCK      | 3  | 0.3333                 | 0.0037 | 3.0000 | 0.3333 |
| Heat Shock cognate 71 kDa protein                             | HSPA8    | 3  | 0.6667                 | 0.0007 | 2.6939 | 0.3712 |
| Presenilin-2                                                  | PSEN2    | 3  | 1.0000                 | 0.0000 | 2.0000 | 0.5000 |
| <b>C-C motif chemokine 5</b>                                  | CCL5     | 2  | 0.0000                 | 1.0000 | 1.0000 | 1.0000 |
| <b>Gamma-aminobutyric acid receptor subunit alpha-1</b>       | GABRA1   | 2  | 0.0000                 | 1.0000 | 1.0000 | 1.0000 |
| <b>Glycogen synthase kinase-3 beta</b>                        | GSK3B    | 2  | 0.0000                 | 0.3333 | 1.8333 | 0.5455 |
| Mitogen-activated protein kinase8                             | MAPK8    | 2  | 0.0000                 | 0.0799 | 4.1224 | 0.2426 |
| <b>Glutathione S-transferase P</b>                            | GSTP1    | 2  | 0.0000                 | 0.0408 | 5.0612 | 0.1976 |
| Cyclin-dependent kinase 1                                     | CDK1     | 2  | 0.0000                 | 0.0300 | 3.0408 | 0.3289 |
| <b>Caspase-7</b>                                              | CASP7    | 2  | 0.0000                 | 0.0200 | 4.2857 | 0.2333 |
| <b>Caspase-3</b>                                              | CASP3    | 2  | 0.0000                 | 0.0200 | 4.2857 | 0.2333 |
| Cyclin-dependent kinase 2                                     | CDK2     | 2  | 0.0000                 | 0.0134 | 3.3878 | 0.2952 |
| <b>Nitric oxide synthase, endothelial</b>                     | NOS3     | 2  | 0.0000                 | 0.0079 | 3.2041 | 0.3121 |
| <b>Cyclin-A2</b>                                              | CCNA2    | 2  | 0.0000                 | 0.0043 | 3.6122 | 0.2768 |

|                                                                   |          |   |        |        |        |        |
|-------------------------------------------------------------------|----------|---|--------|--------|--------|--------|
| Glucocorticoid receptor                                           | NR3C1    | 2 | 0.0000 | 0.0005 | 3.0816 | 0.3245 |
| <b>E3 ubiquitin-protein ligase XIAP</b>                           | XIAP     | 2 | 0.0000 | 0.0004 | 5.2245 | 0.1914 |
| <b>Dual specificity mitogen-activated protein kinase kinase 1</b> | MAP2K1   | 2 | 1.0000 | 0.0000 | 3.8776 | 0.2579 |
| Receptor tyrosine-protein kinase erbB-4                           | ERBB4    | 2 | 1.0000 | 0.0000 | 3.0408 | 0.3289 |
| MAP kinase-activated protein kinase 2                             | MAPKAPK2 | 2 | 1.0000 | 0.0000 | 3.5918 | 0.2784 |
| <b>Annexin A5</b>                                                 | ANXA5    | 1 | 0.0000 | 0.0000 | 1.0000 | 1.0000 |
| <b>Arachidonate 5-lipoxygenase-activating protein</b>             | ALOX5AP  | 1 | 0.0000 | 0.0000 | 1.0000 | 1.0000 |
| <b>Bcl-2-like protein 1</b>                                       | BCL2L1   | 1 | 0.0000 | 0.0000 | 1.0000 | 1.0000 |
| <b>Retinol-binding protein 4</b>                                  | RBP4     | 1 | 0.0000 | 0.0000 | 1.0000 | 1.0000 |
| <b>Polyunsaturated fatty acid 5-lipoxygenase</b>                  | ALOX5    | 1 | 0.0000 | 0.0000 | 1.0000 | 1.0000 |
| Adenosine kinase                                                  | ADK      | 1 | 0.0000 | 0.0000 | 6.0408 | 0.1655 |
| <b>Aurora kinase A</b>                                            | AURKA    | 1 | 0.0000 | 0.0000 | 1.0000 | 1.0000 |
| <b>TGF-beta receptor type-1</b>                                   | TGFBR1   | 1 | 0.0000 | 0.0000 | 3.4082 | 0.2934 |
| <b>Serine/threonine-protein kinase PLK1</b>                       | PLK1     | 1 | 0.0000 | 0.0000 | 1.0000 | 1.0000 |
| <b>Bifunctional purine biosynthesis protein ATIC</b>              | ATIC     | 1 | 0.0000 | 0.0000 | 1.0000 | 1.0000 |
| <b>Beta-2-microglobulin</b>                                       | B2M      | 1 | 0.0000 | 0.0000 | 1.0000 | 1.0000 |
| <b>Histone acetyltransferase KAT2B</b>                            | KAT2B    | 1 | 0.0000 | 0.0000 | 3.4694 | 0.2882 |
| Peroxisome proliferator-activated receptor gamma                  | PPARG    | 1 | 0.0000 | 0.0000 | 3.4694 | 0.2882 |
| Cyclin-dependent kinase 5 activator 1                             | CDK5R1   | 1 | 0.0000 | 0.0000 | 1.0000 | 1.0000 |
| <b>Triosephosphate isomerase</b>                                  | TPI1     | 1 | 0.0000 | 0.0000 | 1.0000 | 1.0000 |
| <b>Apoptotic protease-activating factor 1</b>                     | APAF1    | 1 | 0.0000 | 0.0000 | 1.0000 | 1.0000 |
| <b>Transthyretin</b>                                              | TTR      | 1 | 0.0000 | 0.0000 | 1.0000 | 1.0000 |
| <b>Fibroblast growth factor receptor 1</b>                        | FGFR1    | 1 | 0.0000 | 0.0000 | 3.3878 | 0.2952 |
| <b>Gamma-aminobutyric acid receptor subunit gamma-2</b>           | GABRG2   | 1 | 0.0000 | 0.0000 | 1.5000 | 0.6667 |
| <b>Gamma-aminobutyric acid receptor subunit beta-3</b>            | GABRB3   | 1 | 0.0000 | 0.0000 | 1.5000 | 0.6667 |
| <b>Adenine phosphoribosyltransferase</b>                          | APRT     | 1 | 0.0000 | 0.0000 | 1.0000 | 1.0000 |
| <b>Alanine--glyoxylate aminotransferase</b>                       | AGXT     | 1 | 0.0000 | 0.0000 | 1.0000 | 1.0000 |
| Cyclin-dependent kinase 5                                         | CDK5     | 1 | 0.0000 | 0.0000 | 1.0000 | 1.0000 |
| <b>Death-associated protein kinase 1</b>                          | DAPK1    | 1 | 0.0000 | 0.0000 | 3.6327 | 0.2753 |
| <b>Insulin-like growth factor I</b>                               | IGF1     | 1 | 0.0000 | 0.0000 | 3.5714 | 0.2800 |
| <b>Peroxisome proliferator-activated receptor alpha</b>           | PPARA    | 1 | 0.0000 | 0.0000 | 3.4694 | 0.2882 |
| <b>Serine/threonine-protein kinase PAK 6</b>                      | PAK6     | 1 | 0.0000 | 0.0000 | 4.2041 | 0.2379 |
| <b>Protein S100-A9</b>                                            | S100A9   | 1 | 0.0000 | 0.0000 | 1.0000 | 1.0000 |
| <b>Vascular endothelial growth factor receptor 2</b>              | KDR      | 1 | 0.0000 | 0.0000 | 3.2653 | 0.3062 |
| <b>C-C chemokine receptor type 1</b>                              | CCR1     | 1 | 0.0000 | 0.0000 | 1.5000 | 0.6667 |
| Nitric oxide synthase, inducible                                  | NOS2     | 1 | 0.0000 | 0.0000 | 3.6327 | 0.2753 |
| <b>RAC-beta serine/threonine-protein kinase</b>                   | AKT2     | 1 | 0.0000 | 0.0000 | 2.6667 | 0.3750 |
| Albumin                                                           | ALB      | 1 | 0.0000 | 0.0000 | 1.0000 | 1.0000 |
| <b>Voltage-dependent L-type calcium channel subunit alpha-1C</b>  | CACNA1C  | 1 | 0.0000 | 0.0000 | 3.6327 | 0.2753 |
| <b>C-C chemokine receptor type 5</b>                              | CCR5     | 1 | 0.0000 | 0.0000 | 1.5000 | 0.6667 |
| <b>Vitamin D3 receptor</b>                                        | VDR      | 1 | 0.0000 | 0.0000 | 3.2653 | 0.3062 |
| Nitric oxide synthase, brain                                      | NOS1     | 1 | 0.0000 | 0.0000 | 3.6327 | 0.2753 |

**Table S2.** - Topological measurements of nodes in the PPI network of chlorpyrifos oxon-induced developmental neurotoxicity.

| Protein                                          | Node     | k  | Clustering coefficient | BC    | ASPL  | CC    |
|--------------------------------------------------|----------|----|------------------------|-------|-------|-------|
| Heat shock protein HSP 90-alpha                  | HSP90AA1 | 11 | 0.109                  | 0.382 | 2.034 | 0.492 |
| Epidermal growth factor receptor                 | EGFR     | 8  | 0.179                  | 0.276 | 2.172 | 0.460 |
| Estrogen receptor                                | ESR1     | 7  | 0.143                  | 0.269 | 2.103 | 0.475 |
| Proto-oncogene tyrosine kinase SRC               | SRC      | 6  | 0.400                  | 0.071 | 2.276 | 0.439 |
| Histone acetyltransferase p300                   | EP300    | 5  | 0.000                  | 0.308 | 2.552 | 0.392 |
| Calmodulin-1                                     | CALM1    | 5  | 0.000                  | 0.158 | 2.414 | 0.414 |
| Mitogen-activated protein kinase1                | MAPK1    | 5  | 0.100                  | 0.095 | 3.172 | 0.315 |
| Tyrosine-protein phosphatase non-receptor type 1 | PTPN1    | 4  | 0.500                  | 0.017 | 2.759 | 0.363 |
| <b>Poly [ADP-ribose] polymerase 1</b>            | PARP1    | 3  | 0.000                  | 0.135 | 3.379 | 0.296 |
| Mitogen-activated protein kinase14               | MAPK14   | 3  | 0.333                  | 0.090 | 2.862 | 0.349 |
| Androgen receptor                                | AR       | 3  | 0.333                  | 0.088 | 2.448 | 0.408 |
| Heat Shock cognate 71 kDa protein                | HSPA8    | 3  | 0.667                  | 0.008 | 2.379 | 0.420 |
| Hepatocyte growth factor receptor                | MET      | 3  | 1.000                  | 0.000 | 2.793 | 0.358 |
| Adenosine receptor A2a                           | ADORA2A  | 2  | 0.000                  | 1.000 | 1.000 | 1.000 |
| Cyclin-dependent kinase 1                        | CDK1     | 2  | 0.000                  | 0.057 | 2.828 | 0.354 |
| Tyrosine-protein kinase Lck                      | LCK      | 2  | 0.000                  | 0.044 | 2.759 | 0.363 |
| Serine/threonine-protein kinase B-raf            | BRAF     | 2  | 0.000                  | 0.044 | 2.759 | 0.363 |
| Cyclin-dependent kinase 2                        | CDK2     | 2  | 0.000                  | 0.032 | 3.276 | 0.305 |
| <b>Cyclin-A2</b>                                 | CCNA2    | 2  | 0.000                  | 0.025 | 3.310 | 0.302 |
| <b>Nitric oxide synthase, endothelial</b>        | NOS3     | 2  | 0.000                  | 0.014 | 2.793 | 0.358 |
| Insulin-like growth factor 1 receptor            | IGF1R    | 2  | 0.000                  | 0.007 | 2.828 | 0.354 |
| MAP kinase-activated protein kinase 2            | MAPKAPK2 | 2  | 1.000                  | 0.000 | 3.690 | 0.271 |
| Aryl hydrocarbon receptor                        | AHR      | 2  | 1.000                  | 0.000 | 2.621 | 0.382 |
| Cyclin-dependent kinase 5                        | CDK5     | 1  | 0.000                  | 0.000 | 1.000 | 1.000 |
| D(2) dopamine receptor                           | DRD2     | 1  | 0.000                  | 0.000 | 1.500 | 0.667 |
| <b>TGF-beta receptor type-1</b>                  | TGFBR1   | 1  | 0.000                  | 0.000 | 3.000 | 0.333 |
| <b>Glutathione S-transferase P</b>               | GSTP1    | 1  | 0.000                  | 0.000 | 1.000 | 1.000 |
| Dual specific protein phosphatase 6              | DUSP6    | 1  | 0.000                  | 0.000 | 4.138 | 0.242 |
| Cannabinoid receptor 1                           | CNR1     | 1  | 0.000                  | 0.000 | 1.500 | 0.667 |
| Nitric oxide synthase, inducible                 | NOS2     | 1  | 0.000                  | 0.000 | 3.379 | 0.296 |
| Glucocorticoid receptor                          | NR3C1    | 1  | 0.000                  | 0.000 | 3.000 | 0.333 |
| Peroxisome proliferator-activated receptor gamma | PPARG    | 1  | 0.000                  | 0.000 | 3.517 | 0.284 |
| Cyclin-dependent kinase 5 activator 1            | CDK5R1   | 1  | 0.000                  | 0.000 | 1.000 | 1.000 |
| Nitric oxide synthase, brain                     | NOS1     | 1  | 0.000                  | 0.000 | 3.379 | 0.296 |
| Mitogen-activated protein kinase8                | MAPK8    | 1  | 0.000                  | 0.000 | 1.000 | 1.000 |
| <b>Caspase-7</b>                                 | CASP7    | 1  | 0.000                  | 0.000 | 4.345 | 0.230 |
| <b>Caspase-3</b>                                 | CASP3    | 1  | 0.000                  | 0.000 | 4.345 | 0.230 |

**Table S3.** - Topological measurements of nodes in the PPI network of paraoxon-induced developmental neurotoxicity.

| Protein                            | Node     | k  | Clustering coefficient | BC    | ASPL  | CC    |
|------------------------------------|----------|----|------------------------|-------|-------|-------|
| Heat shock protein HSP 90-alpha    | HSP90AA1 | 15 | 0.095                  | 0.378 | 1.925 | 0.519 |
| Epidermal growth factor receptor   | EGFR     | 14 | 0.198                  | 0.312 | 1.800 | 0.556 |
| Proto-oncogene tyrosine kinase SRC | SRC      | 14 | 0.220                  | 0.264 | 1.875 | 0.533 |

|                                                                   |          |    |       |       |       |       |
|-------------------------------------------------------------------|----------|----|-------|-------|-------|-------|
| Phosphatidylinositol 3-kinase regulatory subunit alpha            | PIK3R1   | 10 | 0.289 | 0.180 | 2.150 | 0.465 |
| Tyrosine-protein phosphatase non-receptor type 11                 | PTPN11   | 9  | 0.361 | 0.059 | 2.225 | 0.449 |
| Estrogen receptor                                                 | ESR1     | 6  | 0.267 | 0.091 | 2.150 | 0.465 |
| Receptor tyrosine-protein kinase erbB-2                           | ERBB2    | 6  | 0.667 | 0.026 | 2.100 | 0.476 |
| Calmodulin-1                                                      | CALM1    | 5  | 0.000 | 0.108 | 2.525 | 0.396 |
| Insulin-like growth factor 1 receptor                             | IGF1R    | 5  | 0.200 | 0.054 | 2.550 | 0.392 |
| Mitogen-activated protein kinase1                                 | MAPK1    | 5  | 0.200 | 0.021 | 3.150 | 0.317 |
| Heat Shock cognate 71 kDa protein                                 | HSPA8    | 5  | 0.400 | 0.021 | 2.350 | 0.426 |
| Presenilin                                                        | PSEN1    | 4  | 0.500 | 0.400 | 1.200 | 0.833 |
| Gamma-secretase subunit APH-1A                                    | APH1A    | 4  | 0.833 | 0.067 | 1.200 | 0.833 |
| Nicastrin                                                         | NCSTN    | 4  | 0.833 | 0.067 | 1.200 | 0.833 |
| Gamma-secretase subunit PEN-2                                     | PSENEN   | 4  | 0.833 | 0.067 | 1.200 | 0.833 |
| Signal transducer and activator of transcription 1-alpha/beta     | STAT1    | 4  | 0.333 | 0.019 | 2.500 | 0.400 |
| Tyrosine-protein phosphatase non-receptor type 1                  | PTPN1    | 4  | 0.500 | 0.009 | 2.450 | 0.408 |
| Platelet-derived growth factor receptor beta                      | PDGFRB   | 4  | 0.667 | 0.003 | 2.575 | 0.388 |
| Hepatocyte growth factor receptor                                 | MET      | 4  | 0.833 | 0.001 | 2.450 | 0.408 |
| Mitogen-activated protein kinase14                                | MAPK14   | 3  | 0.333 | 0.069 | 2.575 | 0.388 |
| Serine/threonine-protein kinase B-raf                             | BRAF     | 3  | 0.333 | 0.052 | 2.725 | 0.367 |
| Tyrosine-protein kinase ABL1                                      | ABL1     | 3  | 0.667 | 0.009 | 2.275 | 0.440 |
| Presenilin-2                                                      | PSEN2    | 3  | 1.000 | 0.000 | 1.600 | 0.625 |
| Receptor tyrosine-protein kinase erbB-4                           | ERBB4    | 3  | 1.000 | 0.000 | 2.625 | 0.381 |
| <b>Glutathione S-transferase P</b>                                | GSTP1    | 2  | 0.000 | 1.000 | 1.000 | 1.000 |
| <b>Gamma-aminobutyric acid receptor subunit alpha-1</b>           | GABRA1   | 2  | 0.000 | 1.000 | 1.000 | 1.000 |
| <b>Caspase-3</b>                                                  | CASP3    | 2  | 0.000 | 0.167 | 1.333 | 0.750 |
| <b>Poly [ADP-ribose] polymerase 1</b>                             | PARP1    | 2  | 0.000 | 0.167 | 1.333 | 0.750 |
| <b>E3 ubiquitin-protein ligase XIAP</b>                           | XIAP     | 2  | 0.000 | 0.167 | 1.333 | 0.750 |
| <b>Caspase-7</b>                                                  | CASP7    | 2  | 0.000 | 0.167 | 1.333 | 0.750 |
| <b>Fibroblast growth factor receptor 1</b>                        | FGFR1    | 2  | 0.000 | 0.097 | 3.025 | 0.331 |
| <b>Fibroblast growth factor 1</b>                                 | FGF1     | 2  | 0.000 | 0.050 | 3.950 | 0.253 |
| <b>Vascular endothelial growth factor receptor 2</b>              | KDR      | 2  | 0.000 | 0.050 | 2.800 | 0.357 |
| Tyrosine-protein kinase Lck                                       | LCK      | 2  | 0.000 | 0.013 | 2.750 | 0.364 |
| <b>Nitric oxide synthase, endothelial</b>                         | NOS3     | 2  | 0.000 | 0.011 | 2.750 | 0.364 |
| <b>Tyrosine-protein kinase JAK1</b>                               | JAK1     | 2  | 0.000 | 0.001 | 3.150 | 0.317 |
| Androgen receptor                                                 | AR       | 2  | 1.000 | 0.000 | 2.525 | 0.396 |
| <b>Dual specificity mitogen-activated protein kinase kinase 1</b> | MAP2K1   | 2  | 1.000 | 0.000 | 3.600 | 0.278 |
| <b>Macrophage colony-stimulating factor 1 receptor</b>            | CSF1R    | 2  | 1.000 | 0.000 | 2.675 | 0.374 |
| <b>Leucine-rich repeat serine/threonine-protein kinase 2</b>      | LRRK2    | 2  | 1.000 | 0.000 | 2.875 | 0.348 |
| <b>Heat shock 70 kDa protein 1A</b>                               | HSPA1A   | 2  | 1.000 | 0.000 | 2.875 | 0.348 |
| MAP kinase-activated protein kinase 2                             | MAPKAPK2 | 2  | 1.000 | 0.000 | 3.450 | 0.290 |
| Adenosine kinase                                                  | ADK      | 1  | 0.000 | 0.000 | 1.500 | 0.667 |
| <b>Alanine--glyoxylate aminotransferase</b>                       | AGXT     | 1  | 0.000 | 0.000 | 1.000 | 1.000 |
| <b>Triosephosphate isomerase</b>                                  | TPI1     | 1  | 0.000 | 0.000 | 1.000 | 1.000 |

|                                                  |        |   |       |       |       |       |
|--------------------------------------------------|--------|---|-------|-------|-------|-------|
| Albumin                                          | ALB    | 1 | 0.000 | 0.000 | 1.000 | 1.000 |
| Beta-2-microglobulin                             | B2M    | 1 | 0.000 | 0.000 | 1.000 | 1.000 |
| Adenine phosphoribosyltransferase                | APRT   | 1 | 0.000 | 0.000 | 1.000 | 1.000 |
| Bifunctional purine biosynthesis protein<br>ATIC | ATIC   | 1 | 0.000 | 0.000 | 1.000 | 1.000 |
| Aurora kinase A                                  | AURKA  | 1 | 0.000 | 0.000 | 1.000 | 1.000 |
| Serine/threonine-protein kinase PLK1             | PLK1   | 1 | 0.000 | 0.000 | 1.000 | 1.000 |
| Nitric oxide synthase, inducible                 | NOS2   | 1 | 0.000 | 0.000 | 3.500 | 0.286 |
| Death-associated protein kinase 1                | DAPK1  | 1 | 0.000 | 0.000 | 3.500 | 0.286 |
| Cyclin-A2                                        | CCNA2  | 1 | 0.000 | 0.000 | 1.000 | 1.000 |
| Cyclin-dependent kinase 2                        | CDK2   | 1 | 0.000 | 0.000 | 1.000 | 1.000 |
| Protein kinase C alpha type                      | PRKCA  | 1 | 0.000 | 0.000 | 2.775 | 0.360 |
| Prothrombin                                      | F2     | 1 | 0.000 | 0.000 | 1.000 | 1.000 |
| Fibrinogen gamma chain                           | FGG    | 1 | 0.000 | 0.000 | 1.000 | 1.000 |
| Fibroblast growth factor receptor 2              | FGFR2  | 1 | 0.000 | 0.000 | 4.925 | 0.203 |
| Gamma-aminobutyric acid receptor subunit beta-3  | GABRB3 | 1 | 0.000 | 0.000 | 1.500 | 0.667 |
| Gamma-aminobutyric acid receptor subunit gamma-2 | GABRG2 | 1 | 0.000 | 0.000 | 1.500 | 0.667 |
| Glycogen synthase kinase-3 beta                  | GSK3B  | 1 | 0.000 | 0.000 | 2.000 | 0.500 |
| Mitogen-activated protein kinase8                | MAPK8  | 1 | 0.000 | 0.000 | 1.500 | 0.667 |
| Glucocorticoid receptor                          | NR3C1  | 1 | 0.000 | 0.000 | 2.900 | 0.345 |
| Telomerase reverse transcriptase                 | TERT   | 1 | 0.000 | 0.000 | 2.900 | 0.345 |
| TGF-beta receptor type-1                         | TGFBR1 | 1 | 0.000 | 0.000 | 2.900 | 0.345 |
| Insulin-like growth factor I                     | IGF1   | 1 | 0.000 | 0.000 | 3.525 | 0.284 |
| Vascular endothelial growth factor A             | VEGFA  | 1 | 0.000 | 0.000 | 3.775 | 0.265 |
| Retinol-binding protein 4                        | RBP4   | 1 | 0.000 | 0.000 | 1.000 | 1.000 |
| Transthyretin                                    | TTR    | 1 | 0.000 | 0.000 | 1.000 | 1.000 |
| Vitamin D3 receptor                              | VDR    | 1 | 0.000 | 0.000 | 2.850 | 0.351 |

**Table S4.** - Binding energies of molecular docking between organophosphates and their respective hub nodes.

| Target   | PDB entry | Ligand            | Docking energy (kJ/mol) |
|----------|-----------|-------------------|-------------------------|
| HSP90AA1 | 1UY9      | PU6*              | -9.0                    |
|          |           | Diazinon oxon     | -7.2                    |
|          |           | Chlorpyrifos oxon | -6.9                    |
|          |           | Paraoxon          | -7.0                    |
| HSPA8    | 3FZK      | 3BK*              | -8.5                    |
|          |           | Chlorpyrifos oxon | -6.9                    |
| ESR1     | 1A52      | EST*              | -10.4                   |
|          |           | Chlorpyrifos oxon | -6.8                    |
| EP300    | 6V8N      | QS1*              | -12.2                   |
|          |           | Chlorpyrifos oxon | -6.6                    |
| PIK3R1   | 3ZIM      | KKR*              | -9.6                    |
|          |           | Diazinon oxon     | -6.6                    |
|          |           | Paraoxon          | -6.2                    |
| MET      | 2RFN      | AM7*              | -11.1                   |
|          |           | Diazinon oxon     | -6.2                    |
|          |           | Chlorpyrifos oxon | -5.7                    |
|          |           | Paraoxon          | -6.1                    |

|                  |      |                   |      |
|------------------|------|-------------------|------|
| MAPK1            | 1PME | SB2*              | -8.4 |
|                  |      | Chlorpyrifos oxon | -6.1 |
| EGFR             | 1M17 | AQ4*              | -7.2 |
|                  |      | Diazinon oxon     | -6.0 |
|                  |      | Chlorpyrifos oxon | -5.9 |
|                  |      | Paraoxon          | -6.2 |
| APH1A            | 5A63 | PC1*              | -4.8 |
|                  |      | Diazinon oxon     | -5.7 |
|                  |      | Paraoxon          | -5.4 |
| PTPN11           | 3MOW | B2B*              | -6.0 |
|                  |      | Diazinon oxon     | -5.3 |
|                  |      | Paraoxon          | -5.7 |
| CALM1            | 1CTR | TFP*              | -7.5 |
|                  |      | Chlorpyrifos oxon | -4.9 |
| STAT3            | 6NUQ | KQV*              | -6.7 |
|                  |      | Diazinon oxon     | -4.8 |
| ERBB2            | 1N8Z | NAG*              | -4.9 |
|                  |      | Paraoxon          | -4.7 |
| SRC              | 1O46 | 903*              | -7.7 |
|                  |      | Diazinon oxon     | -4.6 |
|                  |      | Chlorpyrifos oxon | -4.2 |
|                  |      | Paraoxon          | -4.7 |
| NCSTN            | 5A63 | NAG*              | -4.7 |
|                  |      | Diazinon oxon     | -4.7 |
|                  |      | Paraoxon          | -4.5 |
| PSENEN           | 6IDF | NAG*              | -4.4 |
|                  |      | Diazinon oxon     | -4.2 |
|                  |      | Paraoxon          | -4.3 |
| PTPN1            | 1C84 | 761*              | -8.1 |
|                  |      | Chlorpyrifos oxon | -5.0 |
| *Original ligand |      |                   |      |

**Table S5.** - Intermolecular interactions of complexes between HSP90AA1, EGFR, MET, and SRC and the organophosphates.

| Complex        | Hydrogen bond (HB) interaction | Distance (Å) for HB interaction | Carbon-hydrogen interaction | Pi-sigma interaction | Pi-Alkyl interaction                           | Pi-Pi interaction |
|----------------|--------------------------------|---------------------------------|-----------------------------|----------------------|------------------------------------------------|-------------------|
| HSP90AA1 – DZO |                                |                                 |                             | Trp162, Leu107       | Tyr139                                         | Phe138            |
| HSP90AA1 – CPO |                                |                                 | Leu103                      | Leu107               | Phe22, Phe170, Ala111                          | Phe138            |
| HSP90AA1 – PO  | Trp162                         | 2.66, 5.09, 5.78                |                             | Leu107               |                                                | Phe138            |
| EGFR-DZO       | Thr830<br>Thr766               | 1.99<br>2.26                    |                             | Leu820               | Met742, Lys721, Leu764, Leu694, Val702, Ala719 |                   |

|          |        |            |              |                                 |                                                                                             |         |
|----------|--------|------------|--------------|---------------------------------|---------------------------------------------------------------------------------------------|---------|
| EGFR-CPO | Thr766 | 2.04       |              | Val702                          | Ala719,<br>Leu768,<br>Leu820,<br>Leu694                                                     |         |
|          | Met769 | 4.63       |              |                                 |                                                                                             |         |
| EGFR-PO  | Lys721 | 1.93       | Gly772       | Leu820                          | Phe699, Val,<br>702, Ala719                                                                 |         |
|          | Met769 | 1.96       |              |                                 |                                                                                             |         |
|          | Thr830 | 2.4        |              |                                 |                                                                                             |         |
| MET-DZO  |        |            |              | Val1092,<br>Met1211,<br>Phe1089 | Tyr1159,<br>Met1160,<br>Ala1108,<br>Leu1140,<br>Ile1084,<br>Leu1157                         |         |
| MET-CPO  |        |            |              |                                 | Ile1145,<br>Leu1142,<br>Phe1124,<br>Met1131,<br>Ala1221,<br>Val1155,<br>Phe1089,<br>Leu1157 |         |
| MET-PO   |        |            |              | Leu1157                         | Val1092,<br>Val1155,<br>Leu1112                                                             | Phe1089 |
| SRC-DZO  | Lys62  | 2.73, 4.52 |              |                                 |                                                                                             |         |
|          | Arg14  | 2.10, 2.82 |              |                                 |                                                                                             |         |
| SRC-CPO  | Lys62  | 3.5        | His60, Cys44 |                                 |                                                                                             |         |
| SRC- PO  | Leu96  | 2.26       |              |                                 |                                                                                             |         |
|          | Gly95  | 2.21       | Ile73        | Tyr61                           |                                                                                             |         |
|          | Tyr89  | 2.87       |              |                                 |                                                                                             |         |

**Figure S1.** - Protein-ligand interactions between organophosphates and hub nodes generated using BIOVIA Discovery Studio Visualizer.

## HSP90AA1

PU6\*

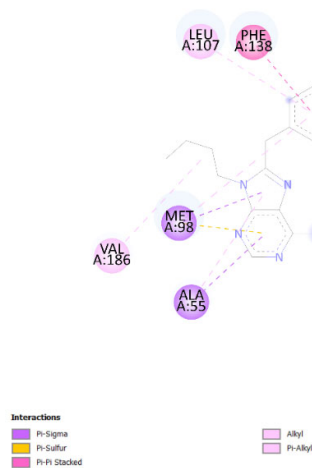

Diazinon oxon

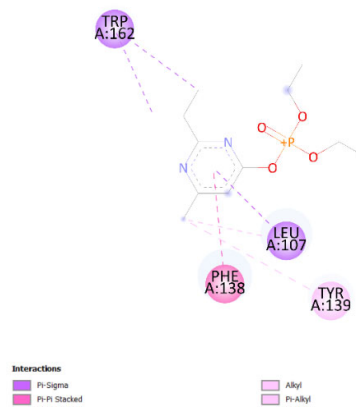

Chlorpyrifos oxon

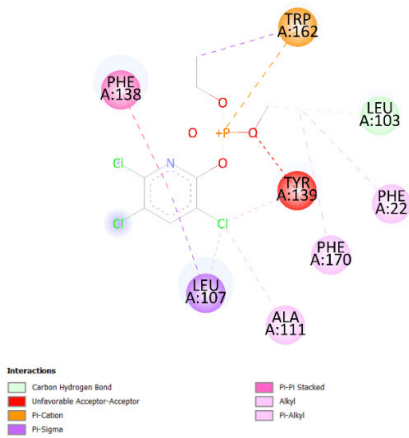

Paraoxon

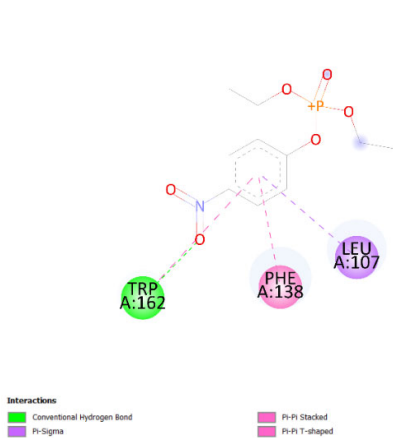

HSPA8  
2BK\*

Chlorpyrifos oxon



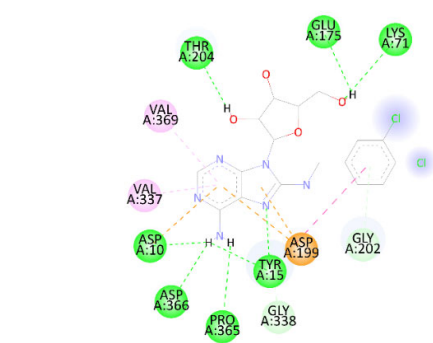

**Interactions**

|                            |                        |
|----------------------------|------------------------|
| Conventional Hydrogen Bond | Pi-Donor Hydrogen Bond |
| Carbon Hydrogen Bond       | Pi-Pi T-shaped         |
| Pi-Anion                   | Pi-Alkyl               |

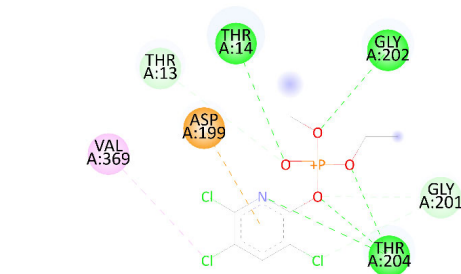

**Interactions**

|                            |          |
|----------------------------|----------|
| Conventional Hydrogen Bond | Pi-Anion |
| Carbon Hydrogen Bond       | Alkyl    |

ESR1  
EST\*

Chlorpyrifos oxon

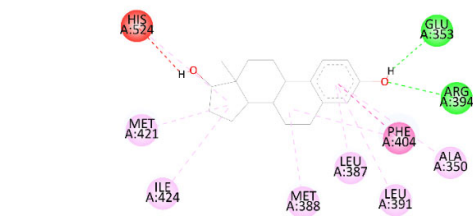

**Interactions**

|                            |          |
|----------------------------|----------|
| Conventional Hydrogen Bond | Alkyl    |
| Unfavorable Donor-Donor    | Pi-Alkyl |
| Pi-Pi T-shaped             |          |

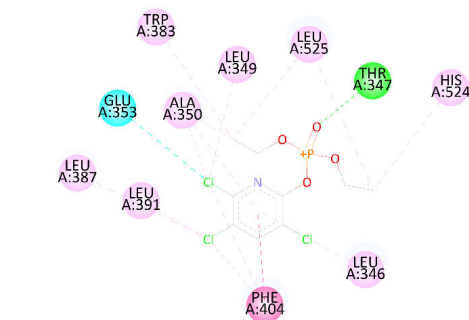

**Interactions**

|                            |          |
|----------------------------|----------|
| Conventional Hydrogen Bond | Alkyl    |
| Halogen (Cl, Br, I)        | Pi-Alkyl |
| Pi-Pi T-shaped             |          |

## EP300

QS1\*

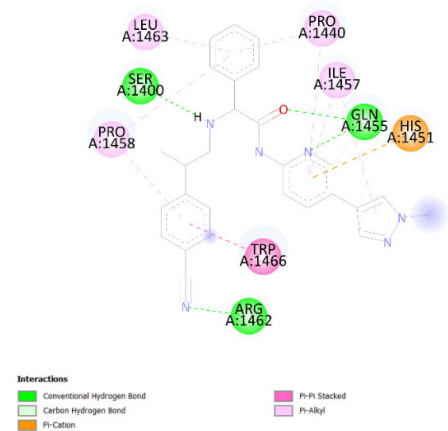

## Chlorpyrifos oxon

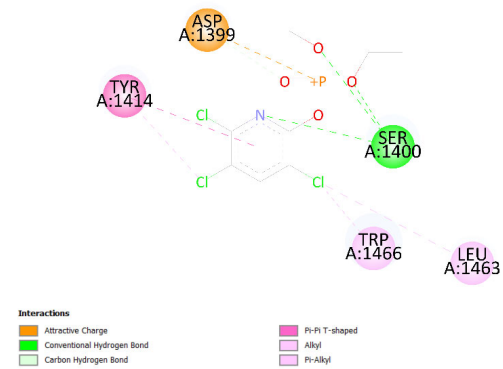

## PIK3R1

KKR\*

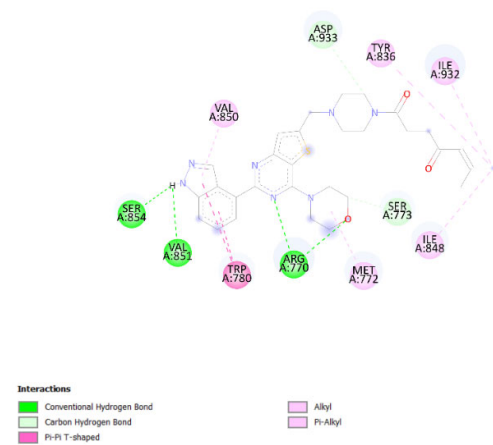

## Diazinon oxon

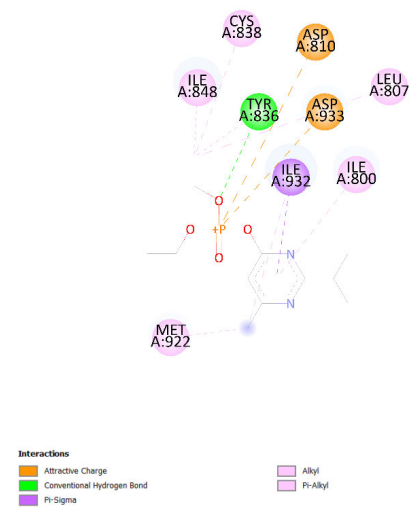

## Paraoxon

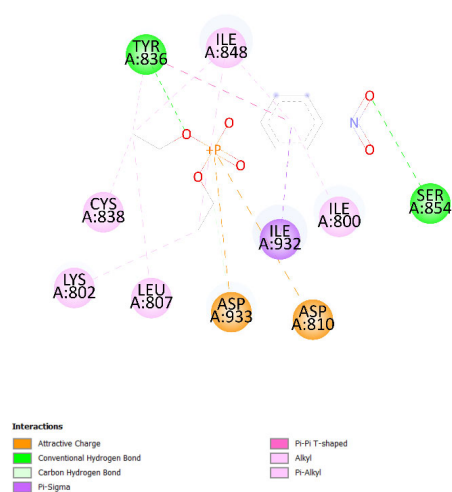

## MET

AM7\*

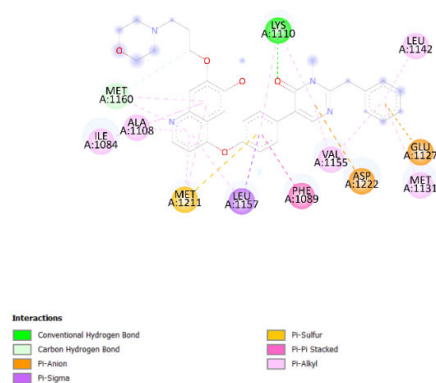

## Diazinon oxon

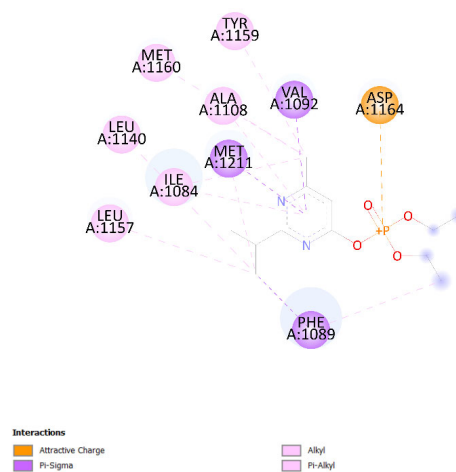

## Chlorpyrifos oxon

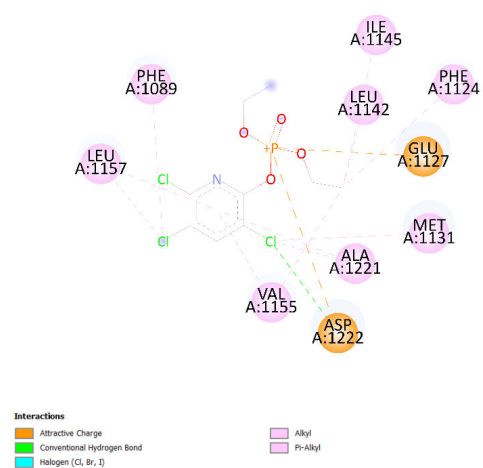

## Paraoxon

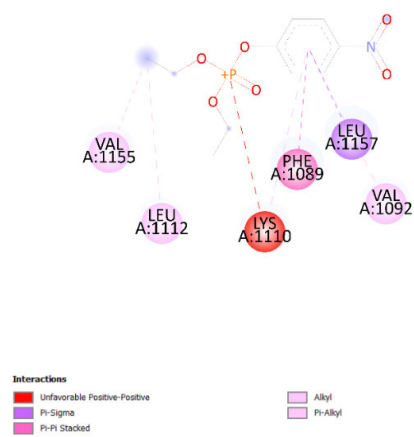

## MAPK1

SB2\*

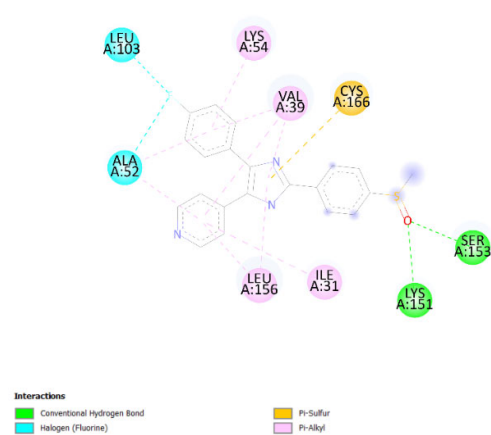

## Chlorpyrifos oxon

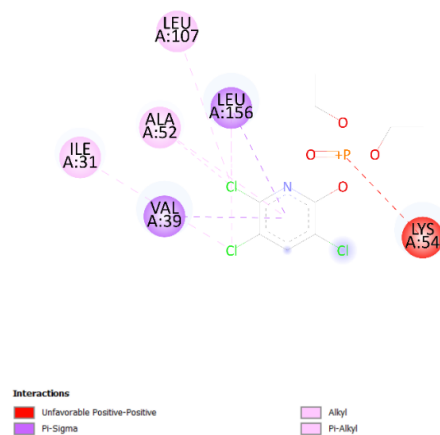

## EGFR

## AQ4\*

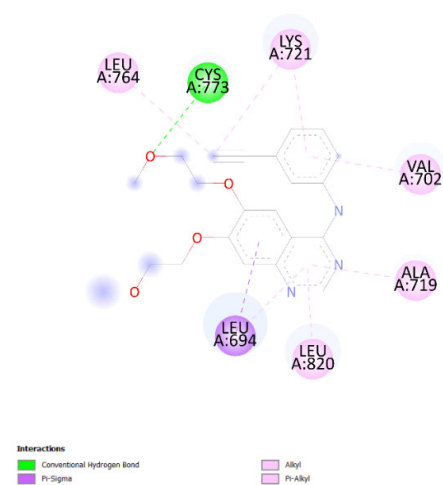

## Diazinon oxon

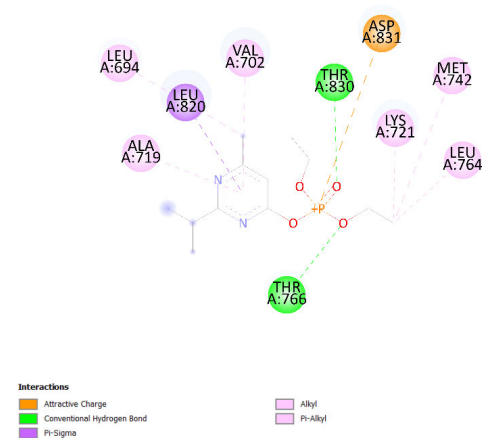

## Chlorpyrifos oxon

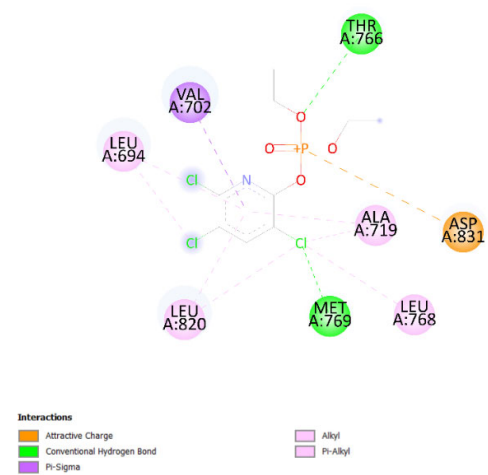

## Paraoxon

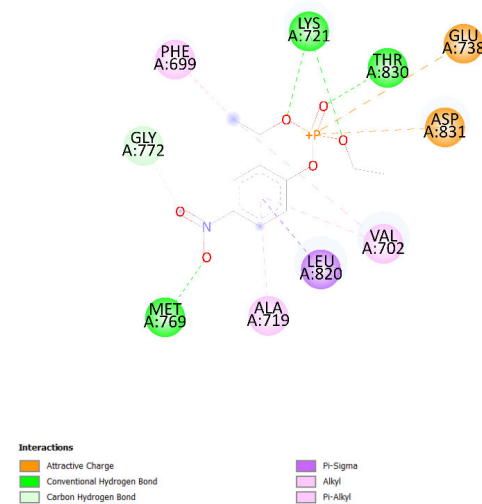

## APH1A

PC1\*

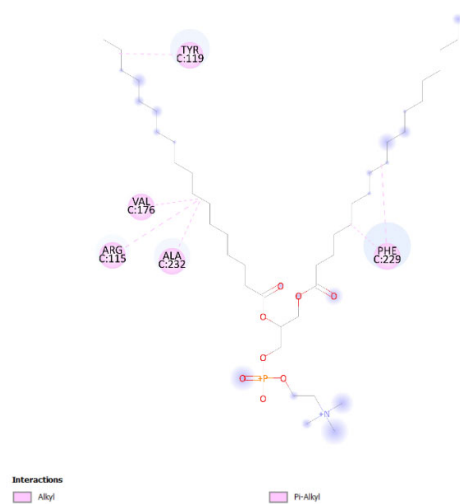

## Diazinon oxon

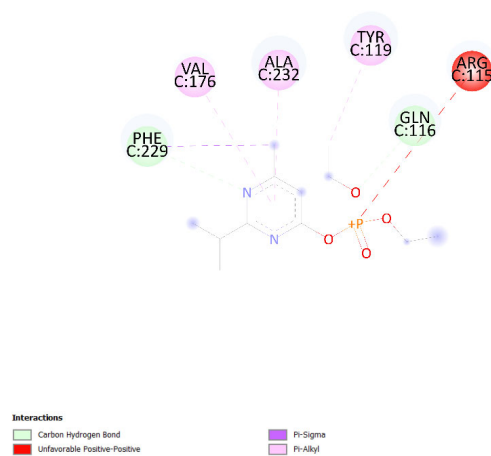

## Paraoxon

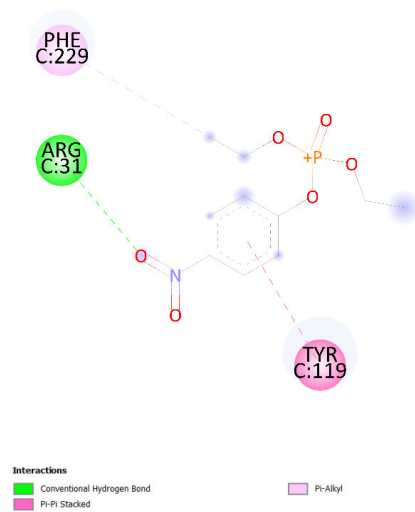

PTPN11  
B2B\*

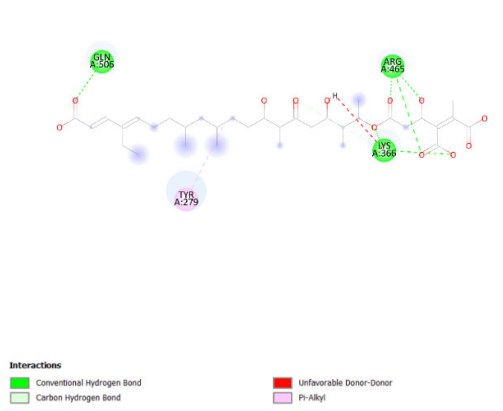

Diazinon oxon

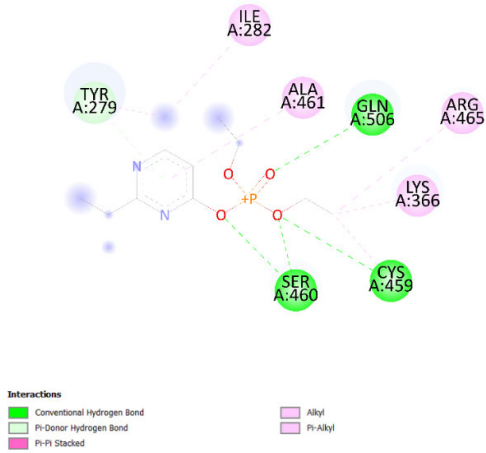

Paraoxon

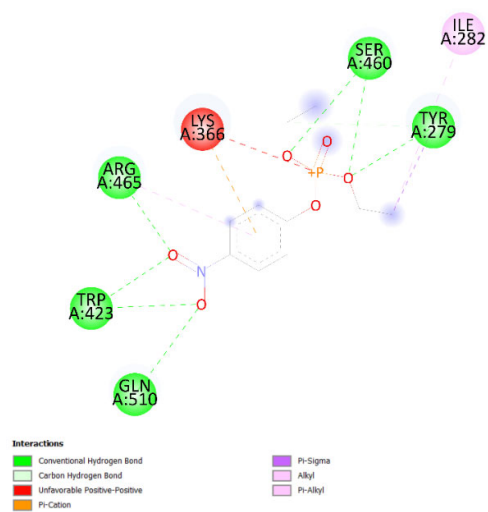**CALM1**

TFP\*

Chlorpyrifos oxom



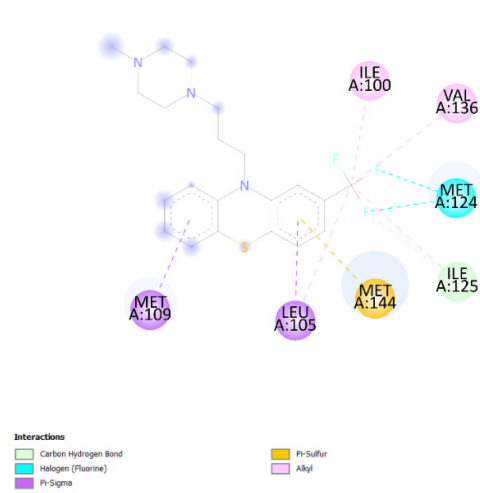

STAT3  
KQV\*

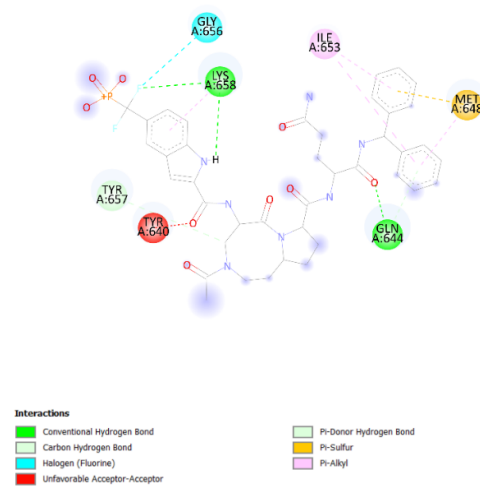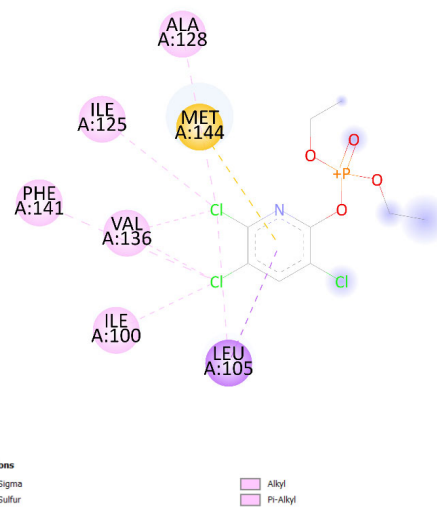

Diazinon oxon

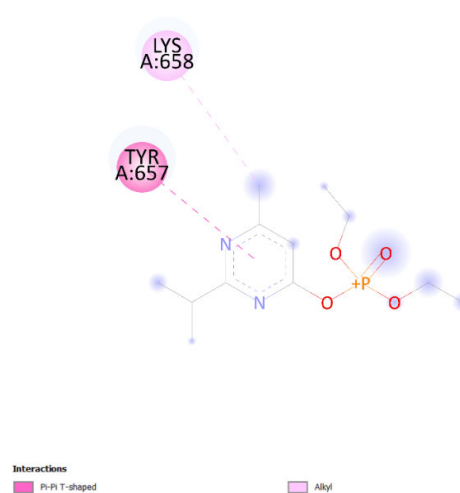

**ERBB2**

NAG\*

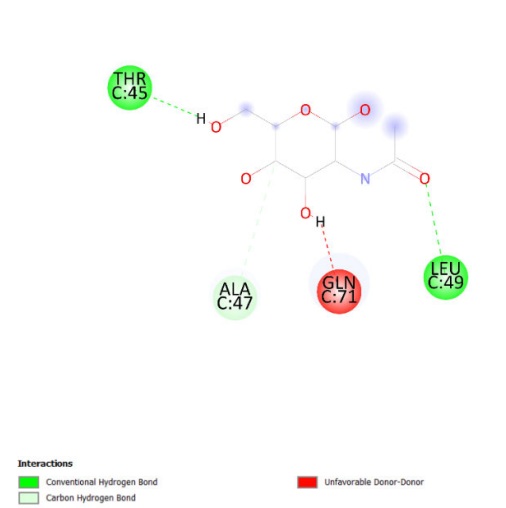

Paraoxon

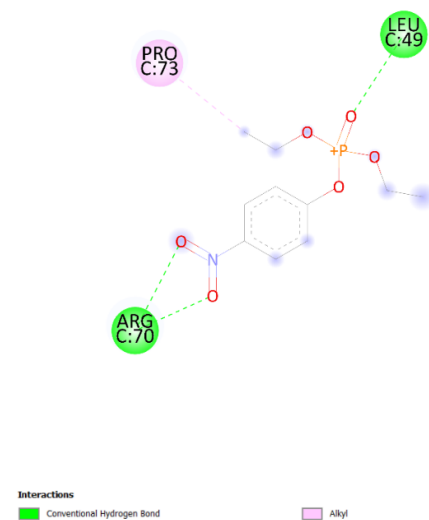**SRC**

903\*

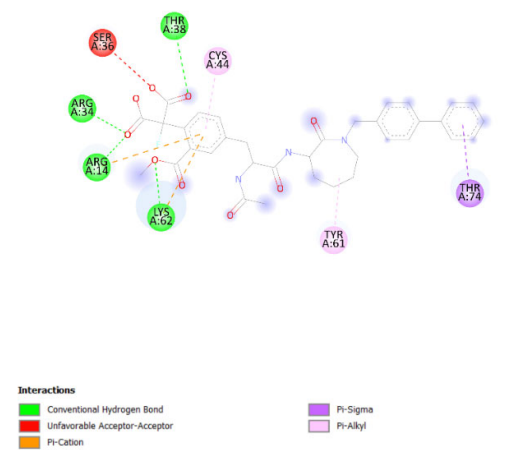

Diazinon oxon

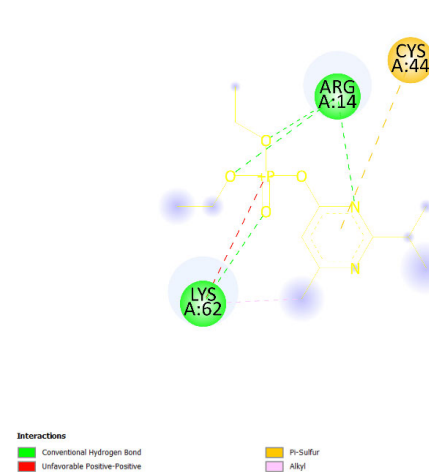

## Chlorpyrifos oxon

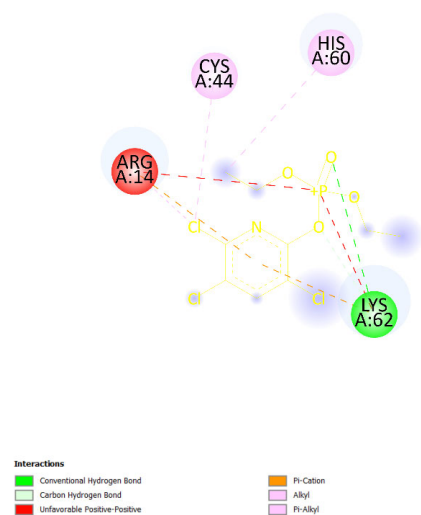

## Paraoxon

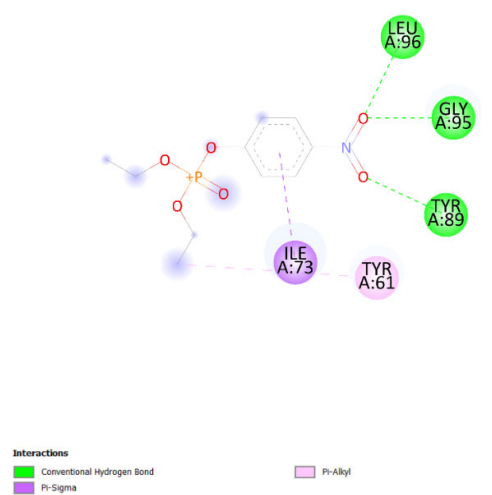

## NCSTN

## NAG\*

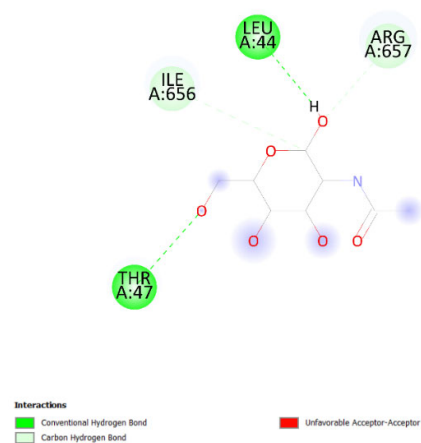

## Diazinon oxon

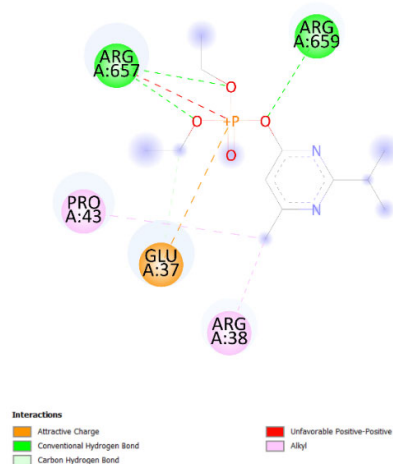

## Paraoxon

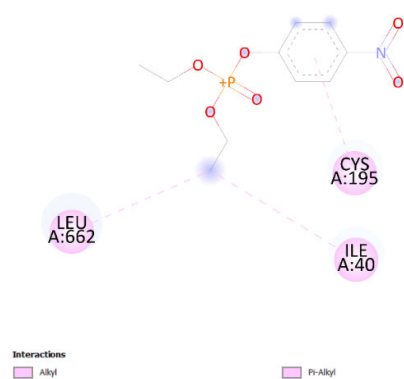

## PSENE1

NAG\*

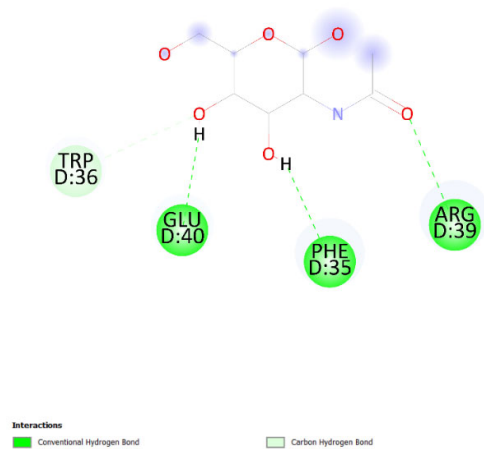

## Diazinon oxon

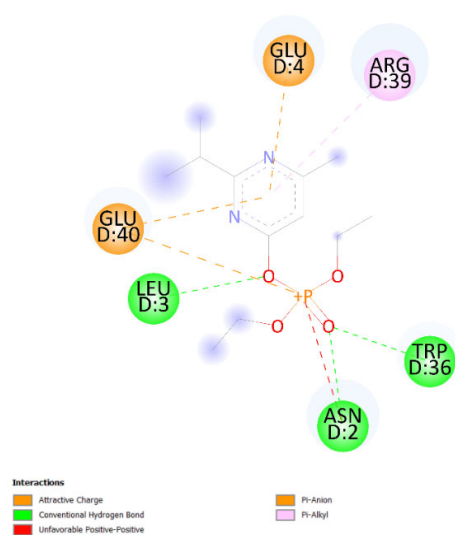

## Paraoxon

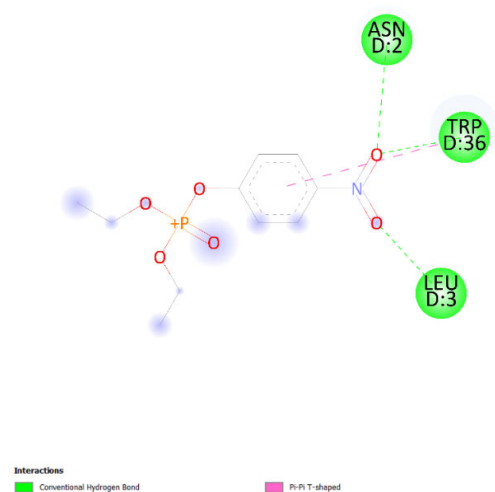

## PTPN1

761\*

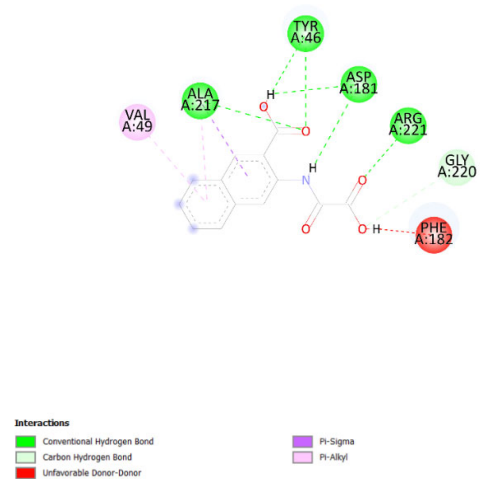

## Chlorpyrifos oxon

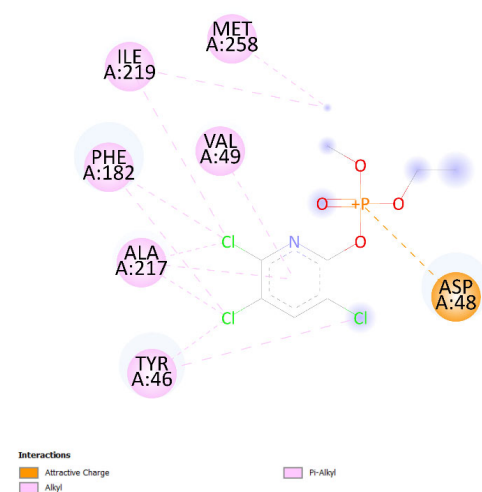

\* original ligand
